# Supplementary material
Source: ML conference proceedings conference paper supplement (https://openaccess.thecvf.com/content/CVPR2026/html/Ye_Low-Rank_Test-Time_Training_CVPR_2026_paper.html)
Supplement: Supplementary file 1 [file Ye_Low-Rank_Test-Time_Training_CVPR_2026_supplemental.pdf]

# Low-Rank Test-Time Training for Pre-Trained Point Cloud Models

## Supplementary Material

Table A1. Efficiency comparison on [ScanObjectNN-C](#) / [ShapeNet-C](#) / [ModelNet40-C](#), evaluated on a single NVIDIA A6000 GPU.

| Method                | Params (M) ↓ | Latency (s/sample) ↓      | Memory (MB) ↓             |
|-----------------------|--------------|---------------------------|---------------------------|
| SMART-PC-Online       | 29.25        | 0.35 / 0.16 / 0.15        | 22798 / 8066 / 8106       |
| MATE-Online           | 29.25        | 0.23 / 0.22 / 0.20        | 8878 / 5560 / 5540        |
| LoTT-PC-Online (Ours) | <b>0.59</b>  | <b>0.17 / 0.17 / 0.13</b> | <b>1174 / 1182 / 1182</b> |

### A. Efficiency Experiments

**Tab.A1** shows that LoTT-PC achieves efficiency gains: **50×** fewer trainable parameters (0.59M vs 29.25M), **7.5~19.4×** lower memory consumption, and lower latency. These results support its real-world deployment.

### B. Limitation

The primary limitation of LoTT-PC lies in the inherent trade-off between adaptation performance and inference latency. Although the proposed design substantially reduces computational overhead by updating only lightweight low-rank modulation units, the need for gradient backpropagation during test-time still introduces extra latency compared to static inference models. While this cost remains significantly lower than that of full fine-tuning, it may nonetheless pose challenges for ultra-real-time applications with stringent latency requirements (*e.g.*, high-speed autonomous driving), where even a few milliseconds are critical.

### C. Broader Impact

The research on robust 3D perception has significant implications for real-world applications and societal safety. Our work directly contributes to the reliability and safety of 3D perception systems. By enabling models to adapt to unforeseen corruptions at test time (*e.g.*, sensor noise from rain, snow, or dust), LoTT-PC can enhance the robustness of applications in autonomous driving [1, 2] and robotics [3, 4]. For instance, a self-driving vehicle’s LiDAR system could leverage our method to mitigate performance degradation caused by real-time sensor deterioration, maintain accurate scene understanding, and potentially prevent accidents. Moreover, the parameter-efficient nature of our approach makes this level of robustness more feasible for deployment on edge devices with limited computational resources, democratizing access to safer AI.

### References

- [1] Zetong Yang, Li Chen, Yanan Sun, and Hongyang Li. Visual point cloud forecasting enables scalable autonomous driving. In *Proc. IEEE Conf. Comput. Vis. Pattern Recog.*, 2024. 1
- [2] Jiakang Yuan, Bo Zhang, Xiangchao Yan, Botian Shi, Tao Chen, Yikang Li, and Yu Qiao. AD-PT: Autonomous driv-

ing pre-training with large-scale point cloud dataset. In *Adv. Neural Inform. Process. Syst.*, 2023. 1

- [3] Jiahao Zeng, Decheng Wang, and Peng Chen. A survey on transformers for point cloud processing: An updated overview. *IEEE Access*, 10:86510–86527, 2022. 1
- [4] Haoyi Zhu, Yating Wang, Di Huang, Weicai Ye, Wanli Ouyang, and Tong He. Point cloud matters: Rethinking the impact of different observation spaces on robot learning. In *Adv. Neural Inform. Process. Syst.*, 2024. 1
